# Supplementary material for: A label-free fluorescent peptide probe for sensitive and selective determination of copper and sulfide ions in aqueous systems
Source: Royal Society of Chemistry journal article supplement (doi:10.1039/d0ra08788b), 2021-01-01
Supplement: d0ra08788b1.pdf [file d0ra08788b1.pdf]

## Supplementary Information

### **A Label-Free Fluorescent Peptide Probe for Sensitive and Selective Determination of Copper and Sulfide ions in Aqueous System**

Yadan Zhang,<sup>a</sup> Yunhui Cai,<sup>a</sup> Yonghui He,<sup>b</sup> Qinlu Lin,<sup>a</sup> Jiali Ren,<sup>a</sup> Dongsheng Cao<sup>c</sup> and Lin Zhang <sup>\*a</sup>

<sup>a</sup> National Engineering Laboratory for Rice and Byproduct Deep Processing, Hunan Key Laboratory of Processed Food For Special Medical Purpose, Hunan Key Laboratory of Forestry Edible Resources Safety and Processing, School of Food Science and Engineering, Center South University of Forestry and Technology, Changsha 410004, P.R. China. E-mail: zhanglin840514@126.com

<sup>b</sup> Key Laboratory of Chemistry in Ethnic Medicinal Resources, State Ethnic Affairs Commission & Ministry of Education, Yunnan Minzu University, Kunming, Yunnan, 650500, P.R. China

<sup>c</sup> Xiangya School of Pharmaceutical Science, Central South University, Changsha 410083, P.R. China

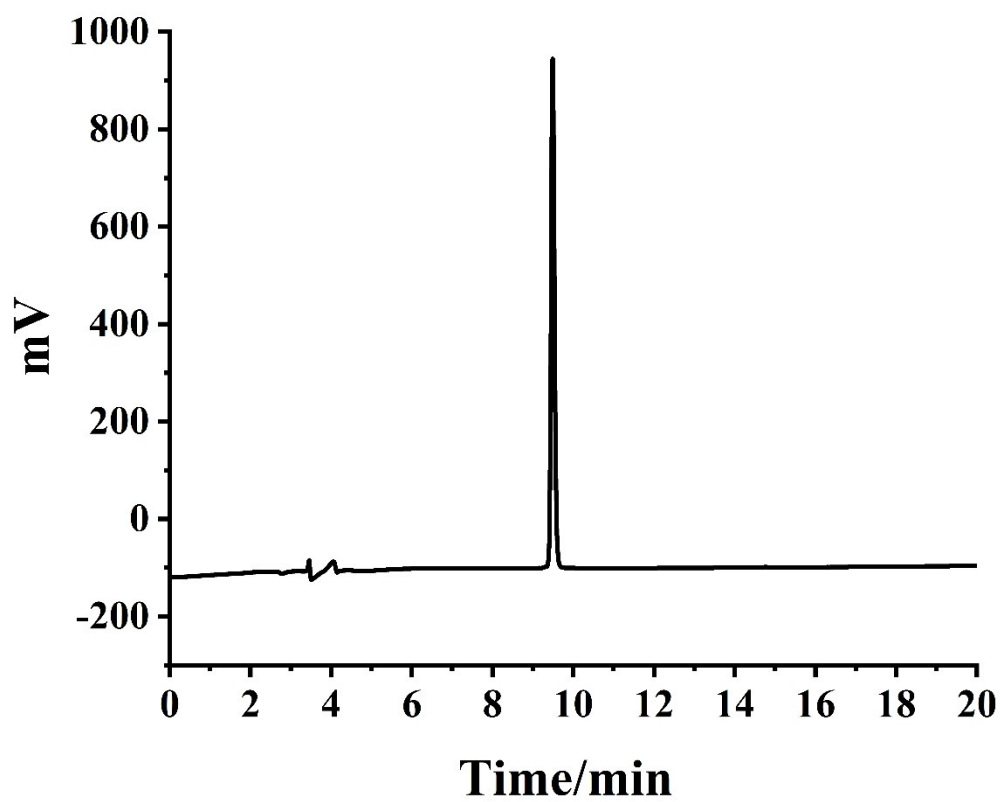

Fig. S1 HPLC spectrum of HDSGWEVHH.

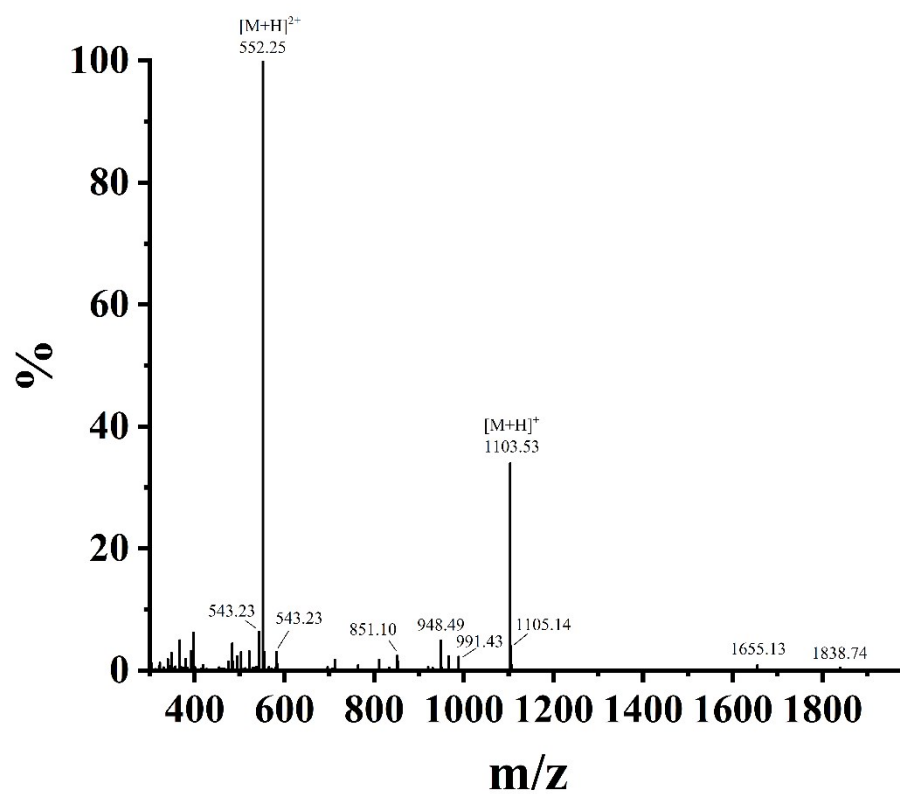

Fig. S2 LC-MS spectrum of the HDSGWVHH.

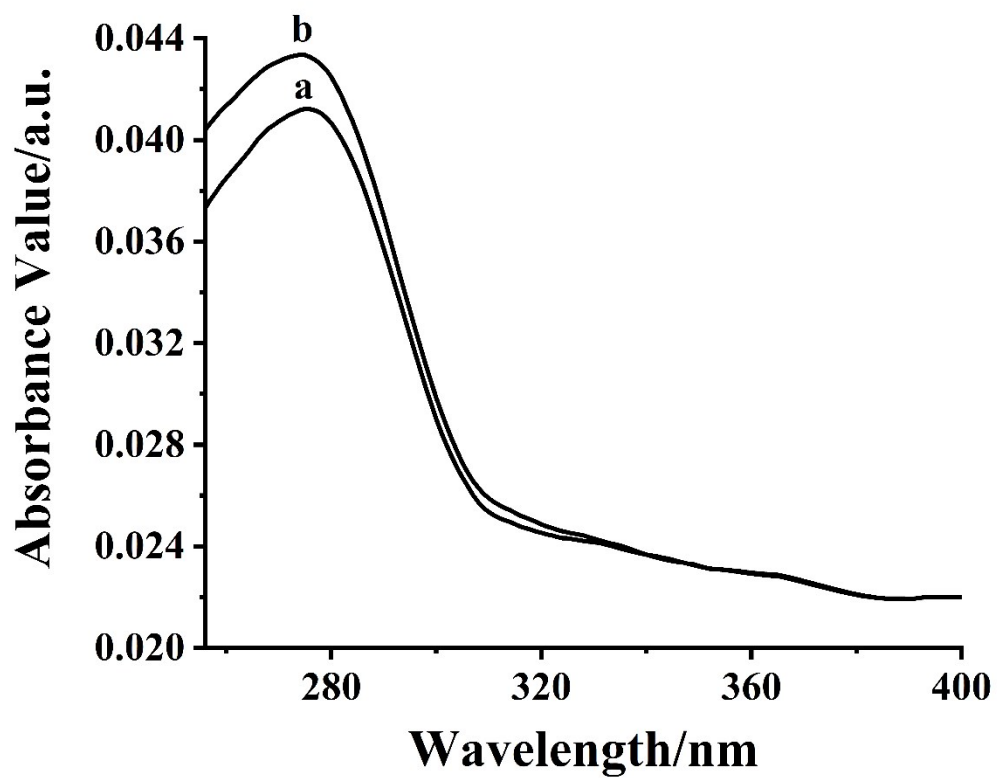

**Fig. S3** UV-Vis absorption spectra of HDSGWEVHH in absence of  $\text{Cu}^{2+}$  (line a) and presence of  $\text{Cu}^{2+}$  (line b). The spectra were obtained in 10 mM HEPES buffer (pH 7.4). The concentration of HDSGWEVHH was at 2  $\mu\text{M}$ , and the one of  $\text{Cu}^{2+}$  was 1  $\mu\text{M}$ .

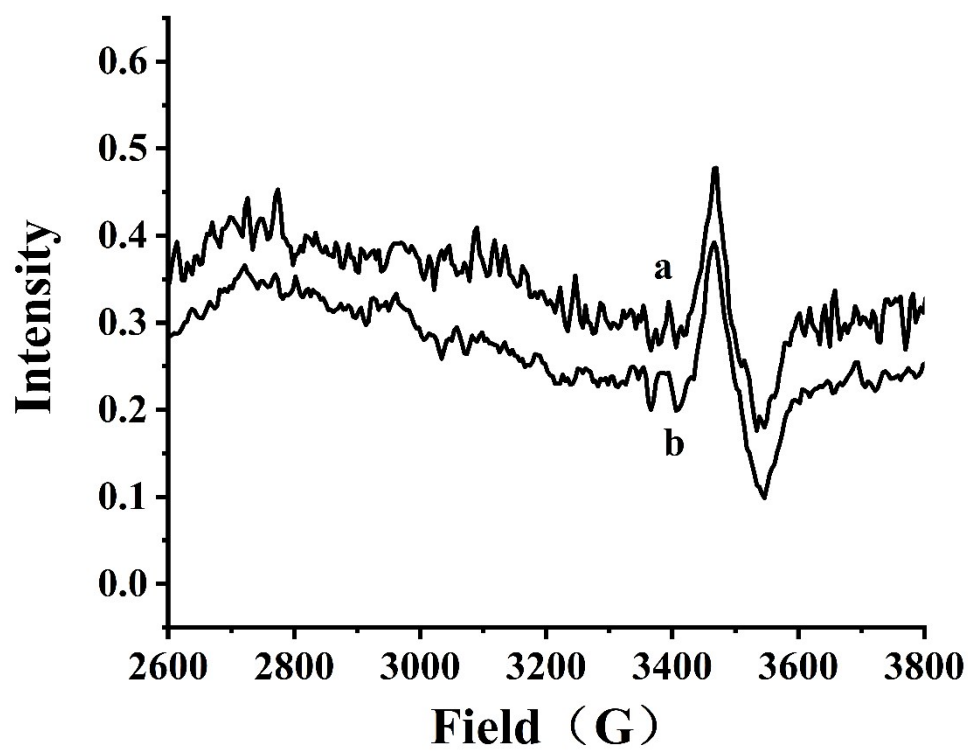

Fig. S4 EPR spectra of the 2  $\mu\text{M}$  HDSGWVHH solution (a) and 2  $\mu\text{M}$  HDSGWVHH/1  $\mu\text{M}$   $\text{Cu}^{2+}$  mixture (b).

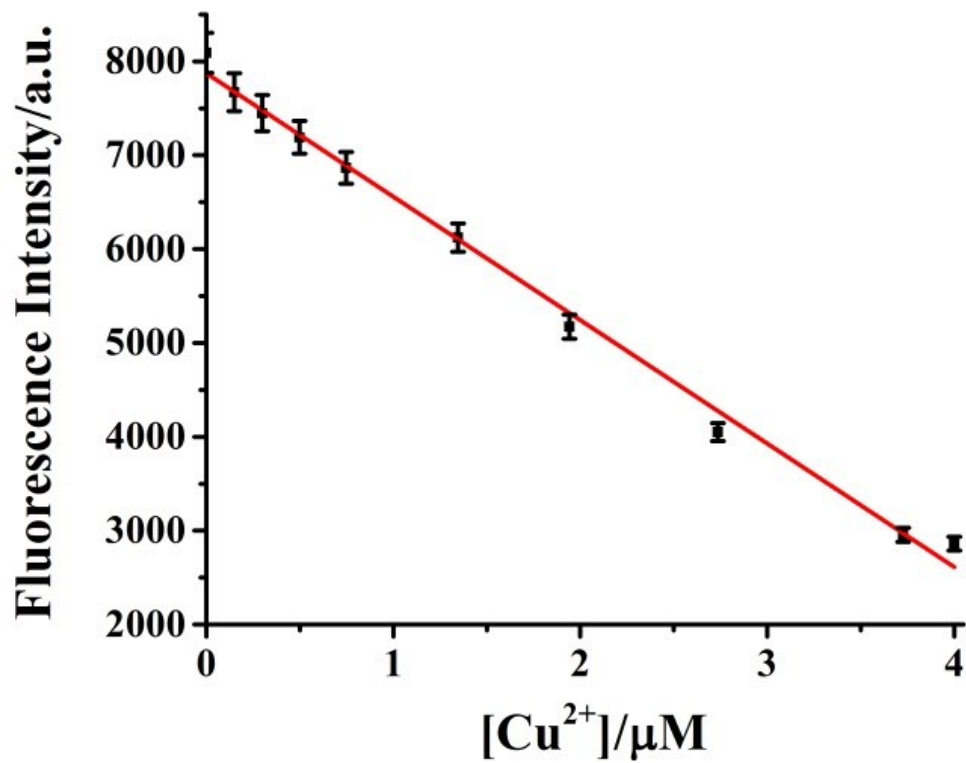

**Fig. S5** Calibration curve of 8  $\mu\text{M}$  HDSGWEVHH for  $\text{Cu}^{2+}$  concentration determination. The linear regression yields  $y = -1315.3[\text{Cu}] + 7874.1$  ( $R^2 = 0.9947$ ) (in  $\mu\text{M}$ ). A HEPES (10 mM, pH 7.4) buffer was used. The error bars were computed from at least three replicates.

**Table S1** Stepped temperature program of graphite digestion procedure

| Temperature/°C | Time/min |
|----------------|----------|
| 95             | 30       |
| 120            | 60       |
| 160            | 60       |
| 190            | 60       |
| 240            | 60       |
